# Supplementary material for: Unusual dielectric response of 4-methyl-1,3-dioxolane derivatives
Source: Royal Society of Chemistry journal article supplement (doi:10.1039/c8cp05913f), 2018-01-01
Supplement: c8cp05913f1.pdf [file c8cp05913f1.pdf]

## Supplementary materials

### Unusual dielectric response of 4-methyl-1,3-dioxolane derivatives

Marzena Rams-Baron <sup>1,2\*</sup>, Agnieszka Jędrzejowska <sup>1,2</sup>, Mateusz Dulski <sup>2,3</sup>, Kamila Wolnica <sup>1,2</sup>, Korbinian Geirhos <sup>4</sup>, Peter Lunkenheimer <sup>4</sup>, Marian Paluch <sup>1,2</sup>

<sup>1</sup>*Institute of Physics, University of Silesia, 75 Pulku Piechoty 1a, 41-500 Chorzow, Poland*

<sup>2</sup>*Silesian Center for Education and Interdisciplinary Research, 75 Pulku Piechoty 1a, 41-500 Chorzow, Poland*

<sup>3</sup>*Institute of Material Science, 75 Pulku Piechoty 1a, 41-500 Chorzow, Poland*

<sup>4</sup>*Experimental Physics V, Center for Electronic Correlations and Magnetism, University of Augsburg, 86159 Augsburg, Germany*

\*corresponding author: [marzena.rams-baron@us.edu.pl](mailto:marzena.rams-baron@us.edu.pl)

#### 1. The comparison of theoretical and experimental Raman spectra for MD derivatives

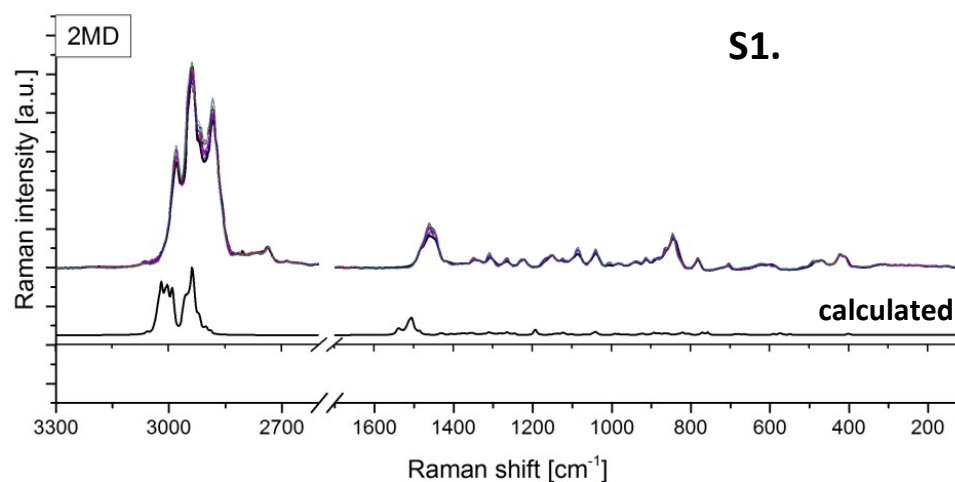

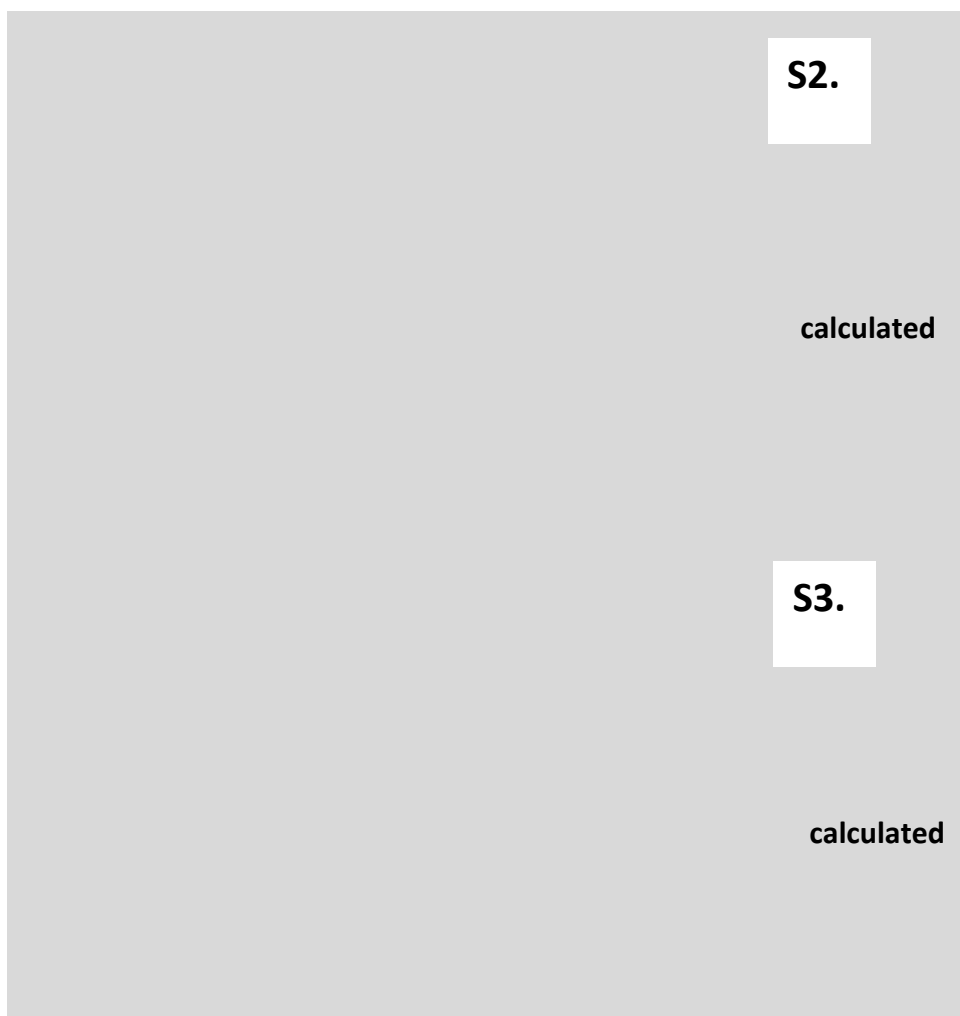

**Figure S1-S3.** Temperature-dependent Raman spectra of 2MD, 3MD, 5MD collected in the 3300 - 120  $\text{cm}^{-1}$  range at temperatures from 293 K to 113 K juxtaposed with theoretical spectrum calculated for theoretical models assumed after optimization procedure for dioxolane derivatives (2MD: ring-like, 3MD: deformed ring-like, 5MD: Möbius ribbon).
